# Supplementary material for: Abnormal Cellular Phenotypes Induced by Three TMPO/LAP2 Variants Identified in Men with Cardiomyopathies
Source: MDPI journal article supplement (doi:10.3390/cells12020337), 2023-01-16
Supplement: s1 [file s1]

## File S2 List of Primers

### Primers used for generation of plasmids encoding LAP2 missense variants

p.(Leu124Phe) forward 5' gaagatcttttgatcagttgtgaaatacggagtg 3'  
reverse 5' cactccgtatttcacaaactgatccaaaagatcttc 3';

p.(Ala240Thr) forward 5' gcagtaccgaactacagacagctaagaaagtacatac 3'  
reverse 5' gtatgtactttcttagctgtctgtagttcggtactgc 3'

p.(Arg690Cys) forward 5' ggaggagaagtatgcaaagtaattaaaaagtgtggaaataaacac 3'  
reverse 5' gtgtttattccacacttttaattactttgcatacttctctcc 3';

### Primers used for generation of plasmids encoding the LAP2 $\alpha$ variant p.(Gly395Glufs\*11)

p.(Gly395Glufs\*11) forward 5' ggtaggtagttgcctgaacttctaactctatgc 3'  
reverse 5' gcatagagttagaagttcaggcaaactacctacc 3'.

p.(Gly395Glufs11)-DDK forward 5' – gccgccgcgatcgccatgccggagttcctggaag – 3'  
reverse 5'- ctgctcgagcgccgcgctcatccagtgggggcatag -3'

### Primers used to amplify by PCR the cDNA encoding BAF

for further ligation into the EcoR1 and Xba1 sites of pcDNA-3HA (Addgene):

BAF forward : 5' -gcgaattcacaacctcccaaaagcaccg-3'  
reverse : 5' -cgtctagactacaagaaggcatcacacc-3'

### Primers used for qRT-PCR

#### Human primer sequences :

HPRT forward : 5' –acccacgaagtgttgata-3'  
reverse : 5' –aagcagatggccacagaact-3'

GAPDH forward : 5' –gtgaaggtcggagtcacacgg-3'  
reverse : 5' –acatgtaaacatgtagttgaggtc-3'

|                   |                                                                                  |
|-------------------|----------------------------------------------------------------------------------|
| 18S rRNA          | forward : 5'-acggaccagagcgaaagcat-3'<br>reverse : 5'- ggacatctaaggcatcacagac-3'  |
| Beta Actin        | forward : 5'-atcatgtttgagacctcaa-3'<br>reverse : 5'-ttgcgtcaggaggagcaat-3'       |
| Rpl19             | forward : 5'-tcaaaaacaagcggattctca-3'<br>reverse : 5'- gcgtgcttccttggtcttag-3'   |
| TBP               | forward : 5'- gggtttccagctaagttcttg-3'<br>reverse : 5'-agcacaaggccttctaacctt-3'  |
| PPIA              | forward : 5'-ctggttccttctgcgtgaat-3'<br>reverse : 5'- aaccagacaacacacaagactga-3' |
| LAP2 $\alpha$ (1) | forward 5'-gtgacaatgaagaaggaaag-3'<br>reverse 5'-ggtaggtctcccttagaagt-3'         |
| LAP2 $\alpha$ (2) | forward 5'-gaagaaggaaagaagaagaacac-3'<br>Reverse 5'-ttagctgctgtagttcgg-3'        |

#### Rat primer sequences (H9C2 cells)

|         |                                                                                   |
|---------|-----------------------------------------------------------------------------------|
| GAPDH   | forward : 5'-aggagtaagaaccctggac-3'<br>reverse : 5'-ctgggatggaattgtgag-3'         |
| HPRT    | forward : 5'-cccagcgtcgtattagtag-3'<br>reverse : 5'-ttcagtcctgtccataatcagtc-3'    |
| TBP     | forward : 5'-caccgtgaatcttggtgtaa-3'<br>reverse : 5'-cgcagttgtcgtggctctc -3'      |
| HMBS    | forward : 5'-tctagatggctcagatagcatgca-3'<br>reverse : 5'-tggaccatcttctgctgaaca-3' |
| Actin B | forward : 5'- aagtcctcacctccaaaag -3'<br>reverse : 5'- aagcaatgctgtcaccttccc -3'  |
| YWHAZ   | forward : 5'- gatgaagccattgctgaactg -3'<br>reverse : 5'- gtctcctgggtatccgatgc -3' |
