# Supplementary material for: Abnormal Cellular Phenotypes Induced by Three TMPO/LAP2 Variants Identified in Men with Cardiomyopathies
Source: MDPI journal article supplement (doi:10.3390/cells12020337), 2023-01-16
Supplement: s1 [file s1]

## File S1

### 1- Cardiomyopathy Targeted Panel Sequencing

1a - List of genes sequenced in their coding regions.

| Genes  | Reference seq | Genes  | Reference seq |
|--------|---------------|--------|---------------|
| ABBC9  | NM_020297     | MYL2   | NM_000432     |
| ACTC1  | NM_005159     | MYL3   | NM_000258     |
| ACTN2  | NM_001103     | MYLK2  | NM_033118     |
| ANKRD1 | NM_014391     | MYOZ2  | NM_016599     |
| BAG3   | NM_004281     | MYPN   | NM_032578     |
| CRYAB  | NM_001885     | NEBL   | NM_006393     |
| CSRP3  | NM_003476     | NEXN   | NM_144573     |
| DES    | NM_001927     | NKX2-5 | NM_004387     |
| DSG2   | NM_001943     | PLN    | NM_002667     |
| DSP    | NM_004415     | PRKAG2 | NM_016203     |
| DTNA   | NM_001390     | RBM20  | NM_001134363  |
| EMD    | NM_000117     | RYR2   | NM_001035     |
| FHL1   | NM_001159702  | SCN5A  | NM_198056     |
| FLNC   | NM_001458     | TAZ    | NM_000116     |
| GATA4  | NM_002052     | TCAP   | NM_003673     |
| GLA    | NM_000169     | TMPO   | NM_003276     |
| LAMA4  | NM_001105206  | TNNC1  | NM_003280     |
| LAMP2  | NM_002294     | TNNI3  | NM_000363     |
| LDB3   | NM_007078     | TNNT2  | NM_001001430  |
| LMNA   | NM_170707     | TPM1   | NM_001018005  |
| MYBPC3 | NM_000256     | TTN    | NM_001256850  |
| MYH6   | NM_002471     | TTR    | NM_000371     |
| MYH7   | NM_000257     | VCL    | NM_014000     |

1b - Method for gene sequencing.

Custom targeted genes enrichment and DNA library preparation were performed using the NimbleGen EZ choice probes® and Kappa Library preparation kit according to the manufacturer's instructions (NimbleGen®, Roche Diagnostics, Madison, USA). The targeted regions (coding regions and flanking intronic regions ( $\pm 20$  bp) were sequenced using the Illumina MiSeq platform on a 500 cycle Flow Cell (Illumina, Santa Cruz, USA) and MiSeq Software generated FASTQ format files after demultiplexing patients' sequences. Merged single reads and paired-end reads were then aligned on Hg19 human reference genome, using BWA-MEM. Variant calling was performed using the GATK Haplotype Caller program then annotated using ANNOVAR. Written informed consent was obtained from all study participants before inclusion in the study.
